# Supplementary material for: Sacrificial Mo–S modification and P-doping co-assisted activation strategy to enhance the electrochemical performance of cobalt carbonate hydroxide hydrate
Source: Royal Society of Chemistry journal article supplement (doi:10.1039/d3ta02324a), 2023-01-01
Supplement: d3ta02324a1.pdf [file d3ta02324a1.pdf]

## Supporting information

### **Sacrificial Mo-S modification and P doping co-assisted activation strategy to enhance electrochemical performance of cobalt carbonate hydroxide hydrate**

Ting Xiao<sup>\*,a,b</sup>, Zhixin Wang<sup>a</sup>, Tao Jiang<sup>a</sup>, Yushuai Yao<sup>a</sup>, Lihua Jiang<sup>b</sup>, Peng Xiang<sup>b</sup>,  
Shibing Ni<sup>a</sup>, Weifeng Chen<sup>a</sup>, Fujun Tao<sup>c</sup>, Xinyu Tan<sup>\*,a</sup>

*<sup>a</sup> Key Laboratory of Inorganic Nonmetallic Crystalline and Energy Conversion Materials, College of Materials and Chemical Engineering, China Three Gorges University, Yichang, Hubei 443002, P. R. China*

*<sup>b</sup> Hubei Provincial Engineering Technology Research Center for Microgrid, College of Electrical Engineering & New Energy, China Three Gorges University, Yichang, Hubei 443002, P. R. China*

*<sup>c</sup> Department of Chemistry and Biochemistry, Northern Illinois University, DeKalb, IL 60115, USA*

## **1. Experimental**

---

\* E-mail address: tingxiao@ctgu.edu.cn

\* E-mail address: tanxin@ctgu.edu.cn

## 1.1 Raw material

$\text{Co}(\text{NO}_3)_2 \cdot 6\text{H}_2\text{O}$  ( $\geq 98.5\%$ ) and urea ( $\text{CH}_4\text{N}_2\text{O}$ ,  $\geq 99\%$ ) were purchased from Sinopharm Chemical Reagent Co. Ltd. Ammonium molybdate ( $(\text{NH}_4)_6\text{Mo}_7\text{O}_{24} \cdot 4\text{H}_2\text{O}$ ,  $\geq 99.0\%$ ) was purchased from Sinopharm Chemical Reagent Co, Ltd. Ammonium fluoride ( $\text{NH}_4\text{F}$ ,  $\geq 98\%$ ) was purchased from Tianjin Zonghengxing Chemical Reagents Ltd. Thioacetamide (TAA) ( $\text{C}_2\text{H}_5\text{NS}$ ,  $\geq 99\%$ ) was supplied by Tianjin Tianli Chemical Reagents Ltd. Sodium hypophosphite ( $\text{NaH}_2\text{PO}_2$ , 99.0%) and potassium hydroxide (KOH, 95%) come from Sinopharm Chemical Reagent Co, Ltd. Deionized (DI) water were used throughout all experiments.

Nickel foam (Purity:  $\sim 99.99\%$ , Porosity:  $\geq 96.0\%$ , Average hole diameters:  $\sim 0.25$  mm, Surface density:  $350 \pm 25 \text{ g/m}^2$ ) was obtained from Hefei Kejing Materials Technology Co. Ltd. CC (Surface density:  $\sim 170 \text{ g m}^{-2}$ ) was supplied by Shanghai Lishuo Composite Materials Technology Co, Ltd.

## 1.2 Characterizations

Phase structure of the as-prepared products was characterized on Rigaku Ultima IV X-ray diffractometer with Cu Ka radiation ( $\lambda = 1.5406 \text{ \AA}$ ). The morphology, lattice structure and element content of products was analyzed by scanning electron microscopy (SEM, Zeiss Gemini SEM 300), transmission electron microscope (TEM, Tecnai, G220 UTWIN) and HR-TEM (JEOL 2100F) with energy dispersive X-ray spectroscopy (EDX). X-ray photoelectron spectroscopy (XPS) analysis was realized on a PHI Quantera II X-ray photoelectron spectrometer. Brunauer-Emmett-Teller (BET, ASAP2460) was used to characterize the specific surface area of the materials.

Electrochemical analyses were carried out with a three-electrode on a CHI760E electrochemical workstation (Shanghai Chenhua Instrument Corp.) in 1 M KOH aqueous solution at room temperature. The as-prepared electrode (1 cm×1 cm), platinum plate electrode (1 cm×1 cm) and Hg/HgO (1M KOH) electrode were used as the working electrode, the counter electrode and the reference electrode, respectively. Electrochemical impedance spectroscopy (EIS) measurements were recorded at open-circuit potential in the frequency range of 100 kHz to 100 mHz. For the ASCs, two-electrode system was used with CCHH/Mo-S/P/A (1.0×1.0 cm<sup>2</sup>) as the cathode, commercial conductive carbon cloth (CC) (1.0×1.0 cm<sup>2</sup>) as the anode and 1 M KOH as electrolyte.

## 2. Electrochemical performance calculation:

Based on GCD curves, the areal capacities and specific capacities of the as-synthesized electrodes were calculated according to the equation S1 and S2, respectively:

$$Q_s = \frac{I \int_0^{\Delta t} V dt}{S \times \Delta V_{mean}} = \frac{I \int_0^{\Delta t} V dt}{S \times \frac{\Delta V}{2}} = 2 \frac{I \int_0^{\Delta t} V dt}{S \times \Delta V} \quad (S1)$$

$$Q_m = \frac{I \int_0^{\Delta t} V dt}{m \times \Delta V_{mean}} = \frac{I \int_0^{\Delta t} V dt}{m \times \frac{\Delta V}{2}} = 2 \frac{I \int_0^{\Delta t} V dt}{m \times \Delta V} \quad (S2)$$

where  $Q_s$ ,  $Q_m$ ,  $I$ ,  $\Delta t$ ,  $V$ ,  $\Delta V_{mean}$ ,  $S$ ,  $m$ , and  $\Delta V$  are the areal capacity (C cm<sup>2</sup>), specific capacity (C g<sup>-1</sup>), discharge current (A), discharge time (s), operating potential (V), mean value of operating potential (V), area of the device (cm<sup>2</sup>), mass (g), and potential window (V) of electroactive materials, respectively.

For the fabrication of ASC device, areal capacity ( $Q$ ,  $C \text{ cm}^{-2}$ ), energy density ( $E$ ,  $W \text{ h cm}^{-2}$ ) and power density ( $P$ ,  $W \text{ cm}^{-2}$ ) of device were calculated from current charging/discharging curves using the following equations, respectively.

$$Q = 2 \frac{I \int_0^{\Delta t_s} V_s dt}{S \times \Delta V_s}$$

$$E = \frac{I \int_0^{\Delta t_s} V_s dt}{3.6 \times S}$$

$$P = \frac{3600 \times E}{\Delta t_s}$$

where  $I$ ,  $S$ ,  $\Delta t_s$ ,  $V_s$  and  $\Delta V_s$  are the discharge current (A), area of the device ( $\text{cm}^2$ ), discharge time (s), operating voltage (V), and voltage window (V) of the discharge process, respectively.

### 3. Supplementary figures and tables:

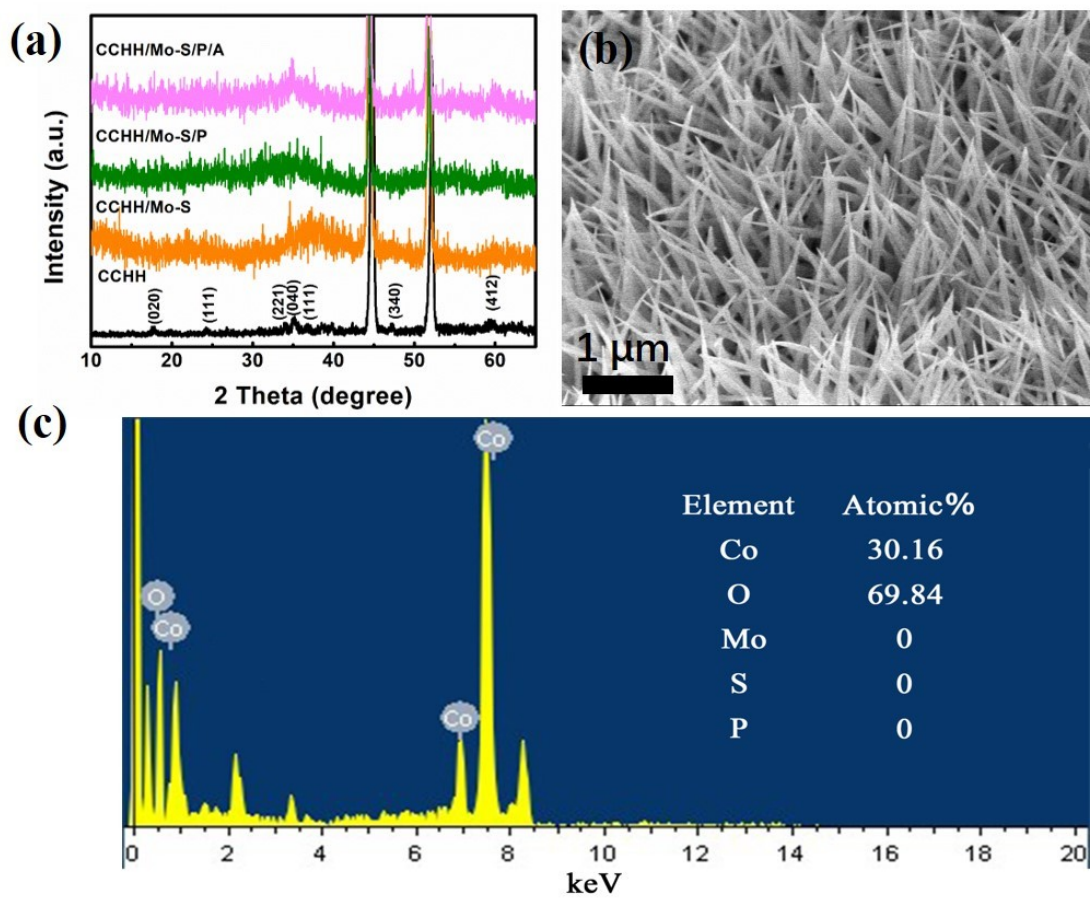

**Fig. S1** (a) XRD patterns of the CCHH, CCHH/Mo-S, CCHH/Mo-S/P and CCHH/Mo-S/P/A. (b) SEM image of CCHH. (c) EDS data of the CCHH/Mo-S/P/A.

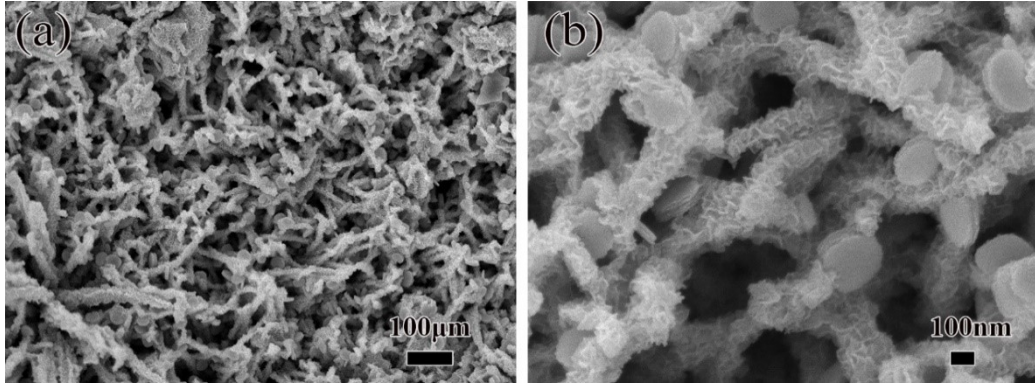

**Fig. S2** SEM images of the CCHH/A at different magnifications.

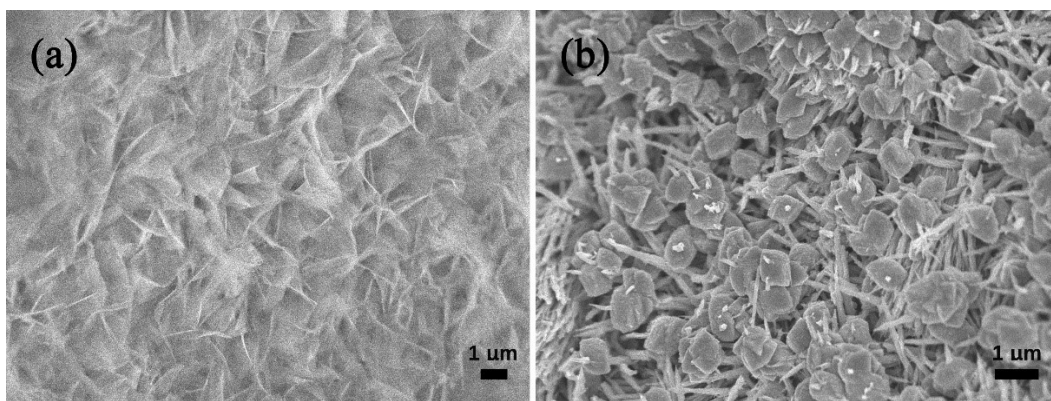

**Fig. S3** (a) SEM image of CCHH/Mo-S/A. (b) SEM image of CCHH/P/A

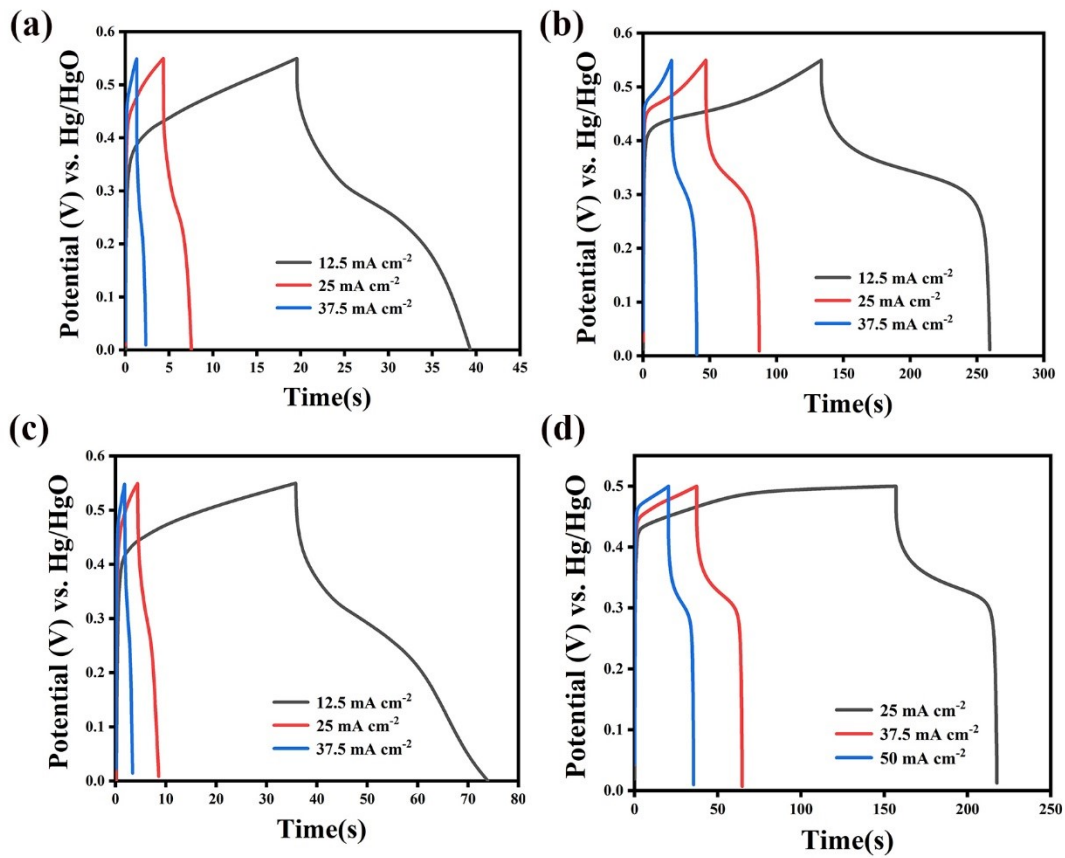

**Fig. S4** GCD curves at different densities of the (a) CCHH/A, (b) CCHH/Mo-S/A, (c) CCHH/P/A and (d) CCHH/Mo-S/P.



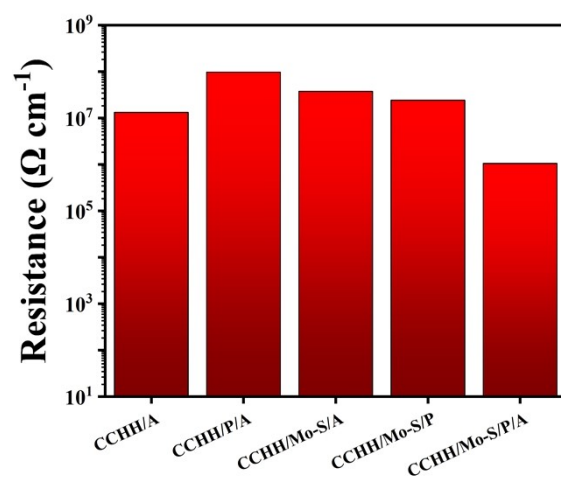

**Fig. S5** Comparison of resistance for CCHH/A, CCHH/P/A, CCHH/Mo-S/A, CCHH/Mo-S/P and CCHH/Mo-S/P/A.

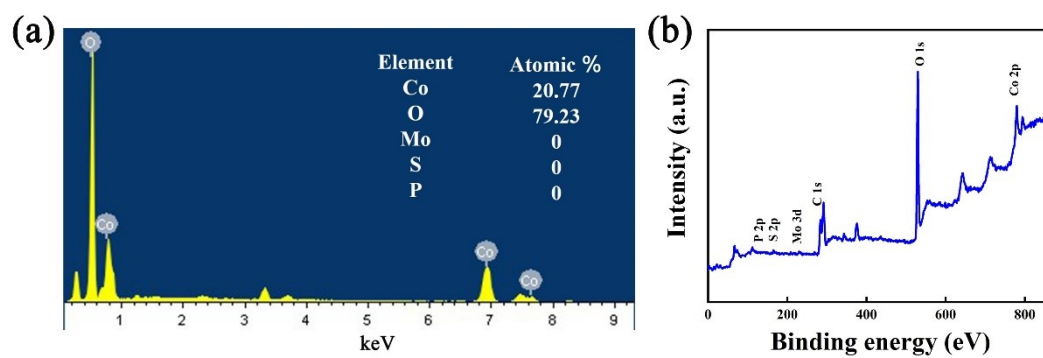

**Fig. S6** (a) EDS data and (b) XPS survey spectra of the CCHH/Mo-S/P/A after 10000 cycles.

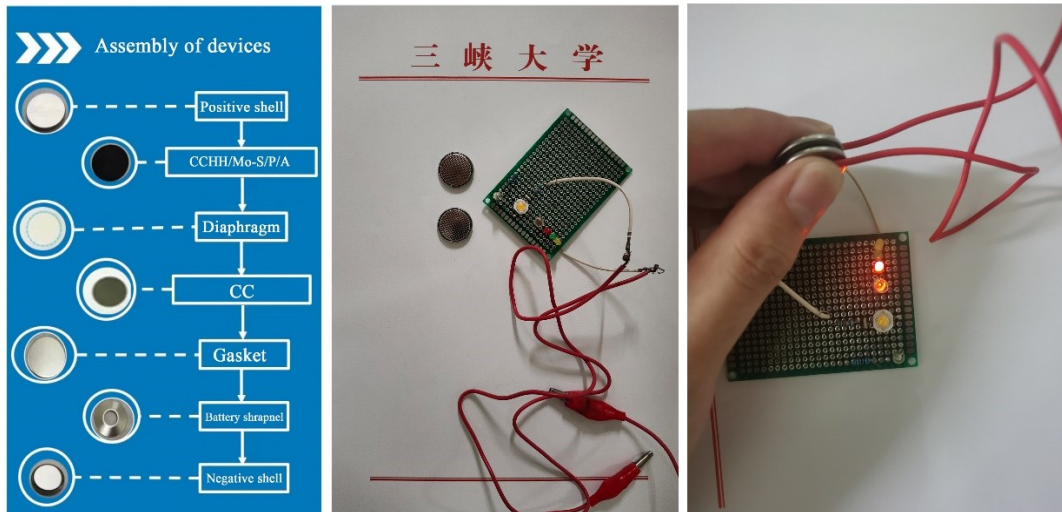

**Fig. S7** CCHH/Mo-S/P/A//CC device assembly process and lighting LED indicator.

**Table S1.** Comparison of the specific capacitance between this work and several reports on Co-based binary metal electrode materials.

| Materials                                                                         | Electrolyte | Operation Voltage (V) | Specific capacitance                                                        | Current density        | Ref. |
|-----------------------------------------------------------------------------------|-------------|-----------------------|-----------------------------------------------------------------------------|------------------------|------|
| FeCo <sub>2</sub> S <sub>4</sub>                                                  | 6 M KOH     | 0~0.4                 | 1.644 F cm <sup>-2</sup><br>(0.66 C cm <sup>-2</sup> )                      | 50 mA cm <sup>-2</sup> | [20] |
| FeCo <sub>2</sub> S <sub>4</sub>                                                  | 1 M KOH     | 0~0.4                 | 7.66 F cm <sup>-2</sup><br>(3.06 C cm <sup>-2</sup> )                       | 5 mA cm <sup>-2</sup>  | [21] |
| Co-Mo-S                                                                           | 1 M KOH     | 0~0.45                | 1,080 F g <sup>-1</sup> (468 C g <sup>-1</sup> )                            | 1 A g <sup>-1</sup>    | [22] |
| CoNi <sub>2</sub> S <sub>4</sub>                                                  | 6 M KOH     | 0~0.4                 | 1,576.8 F g <sup>-1</sup><br>(630.72 C g <sup>-1</sup> )                    | 0.5 A g <sup>-1</sup>  | [23] |
| NiCo <sub>2</sub> S <sub>4</sub>                                                  | 2 M KOH     | 0~0.45                | 1,777 F g <sup>-1</sup><br>(799.65 C g <sup>-1</sup> )                      | 8 A g <sup>-1</sup>    | [24] |
| CuCo <sub>2</sub> S <sub>4</sub>                                                  | 4 M KOH     | 0~0.5                 | 908.9 F g <sup>-1</sup><br>(454.45 C g <sup>-1</sup> )                      | 5 mA cm <sup>-2</sup>  | [25] |
| CuCo <sub>2</sub> S <sub>4</sub>                                                  | 2 M KOH     | 0~0.4                 | 1,852 F g <sup>-1</sup><br>(740.8 C g <sup>-1</sup> )                       | 2 A g <sup>-1</sup>    | [26] |
| CoMoS <sub>4</sub>                                                                | 6 M KOH     | 0~0.45                | 415 F g <sup>-1</sup><br>(186.75 C g <sup>-1</sup> )                        | 0.5 A g <sup>-1</sup>  | [27] |
| Co <sub>3</sub> S <sub>4</sub> /CoMo <sub>2</sub> S <sub>4</sub>                  | 3 M KOH     | 0~0.45                | 1,457.8 F g <sup>-1</sup><br>(656 C g <sup>-1</sup> )                       | 1 A g <sup>-1</sup>    | [28] |
| Co-Mo-S                                                                           | 1 M KOH     | 0~0.5                 | 1,805.28 F g <sup>-1</sup><br>(902.64 C g <sup>-1</sup> )                   | 0.5 A g <sup>-1</sup>  | [29] |
| Co <sub>9</sub> S <sub>8</sub> @MoS <sub>2</sub>                                  | 1 M KOH     | 0~0.5                 | 213 mAh g <sup>-1</sup><br>1,225 F g <sup>-1</sup> (490 C g <sup>-1</sup> ) | 1 A g <sup>-1</sup>    | [30] |
| Mo <sub>0.7</sub> Co <sub>0.3</sub> S <sub>2</sub> -C <sub>3</sub> N <sub>4</sub> | 2 M KOH     | 0~0.4                 | 1,145 F g <sup>-1</sup> (458 C g <sup>-1</sup> )                            | 0.5 A g <sup>-1</sup>  | [31] |
| NiCo <sub>2</sub> S <sub>4</sub> @N, S                                            | 6 M KOH     | 0~0.4                 | 1,454 F g <sup>-1</sup> (727 C g <sup>-1</sup> )                            | 1 A g <sup>-1</sup>    | [32] |
| Ni-Co-S                                                                           | 1 M KOH     | 0~0.5                 | 1,440 C g <sup>-1</sup> (720 C g <sup>-1</sup> )                            | 1 A g <sup>-1</sup>    | [33] |
| Ni-Co-S/Co(OH) <sub>2</sub>                                                       | 3 M KOH     | 0~0.5                 | 1,158 F g <sup>-1</sup><br>(521.1 C g <sup>-1</sup> )                       | 1 A g <sup>-1</sup>    | [34] |
| Mn-Co-S                                                                           | 1 M KOH     | 0~0.45                | 1,134 F g <sup>-1</sup><br>(396.9 C g <sup>-1</sup> )                       | 1 A g <sup>-1</sup>    | [35] |
| Co-Mo-O-S                                                                         | 6 M KOH     | 0~0.35                | 1,437.5 F g <sup>-1</sup><br>(862.5 C g <sup>-1</sup> )                     | 1 A g <sup>-1</sup>    | [36] |
| Co-Mo-O                                                                           | 3 M KOH     | 0~0.6                 | 879 F g <sup>-1</sup><br>(307.65 C g <sup>-1</sup> )                        | 1.5 A g <sup>-1</sup>  | [37] |
| NiCo <sub>2</sub> O <sub>4</sub>                                                  | 2 M KOH     | 0~0.35                |                                                                             | 0.5 A g <sup>-1</sup>  | [38] |

---

|               |         |        |                                                      |                                                      |              |
|---------------|---------|--------|------------------------------------------------------|------------------------------------------------------|--------------|
| CCHH/Mo-S/P/A | 1 M KOH | 0~0.55 | 1429 C g <sup>-1</sup><br>(4.29 C cm <sup>-2</sup> ) | 12.5 mA cm <sup>-2</sup><br>(4.2 A g <sup>-1</sup> ) | This<br>work |
|---------------|---------|--------|------------------------------------------------------|------------------------------------------------------|--------------|

---
